# Supplementary material for: Bi-functional mechanism of H2S detection using CuO–SnO2 nanowires
Source: Royal Society of Chemistry journal article supplement (doi:10.1039/c3tc30987h), 2013-01-01
Supplement: c3tc30987h.pdf [file c3tc30987h.pdf]

## Supporting Information

**Table S1.** Comparison of H<sub>2</sub>S sensing properties of the CuO-functionalized SnO<sub>2</sub> nanowires with those of previous reports.<sup>14,18-20, 26-31</sup>

| Materials type                                                   | H <sub>2</sub> S (ppm) | Response ( $R_a/R_g$ ) | Response time (s) | Recovery time (s) | Operating Temp. (°C) | Ref.      |
|------------------------------------------------------------------|------------------------|------------------------|-------------------|-------------------|----------------------|-----------|
| <b>CuO-functionalized SnO<sub>2</sub> nanowires</b>              | 0.1–1                  | 10–15                  | 9                 | 8                 | 300                  | this work |
| <b>CuO-loaded SnO<sub>2</sub> film</b>                           | 50                     | $2.5 \times 10^4$      | 80                | 100               | 200                  | 14        |
| <b>SnO<sub>2</sub>-CuO-SnO<sub>2</sub> multilayer thick film</b> | 50                     | 210                    | 45                | 41                | 90                   | 18        |
| <b>Cu-doped SnO<sub>2</sub> thin film</b>                        | 1000                   | 910                    | 10                | 1500              | 200                  | 19        |
| <b>CuO-modified SnO<sub>2</sub> nanoribbons</b>                  | 3                      | 180                    | 15                | .                 | 27                   | 20        |
| <b>CuO-doped SnO<sub>2</sub> thin film</b>                       | 50                     | $3.6 \times 10^5$      | 600               | 180               | 150                  | 26        |
| <b>SnO<sub>2</sub>-ZnO-CuO composite thick film</b>              | 50                     | $6 \times 10^4$        | 15                | 420–480           | 250                  | 27        |
| <b>CuO-SnO<sub>2</sub> core/shell nanorods</b>                   | 10                     | $9.4 \times 10^4$      | .                 | .                 | 60                   | 28        |
| <b>Cu-doped SnO<sub>2</sub> nanowires</b>                        | 50                     | $6 \times 10^6$        | .                 | .                 | 150                  | 29        |
| <b>CuO-doped SnO<sub>2</sub> nanowires</b>                       | 20                     | 809                    | 1                 | 332               | 300                  | 30        |
| <b>CuO-loaded SnO<sub>2</sub> nanofibers</b>                     | 10                     | $1.98 \times 10^4$     | 1                 | 10                | 300                  | 31        |

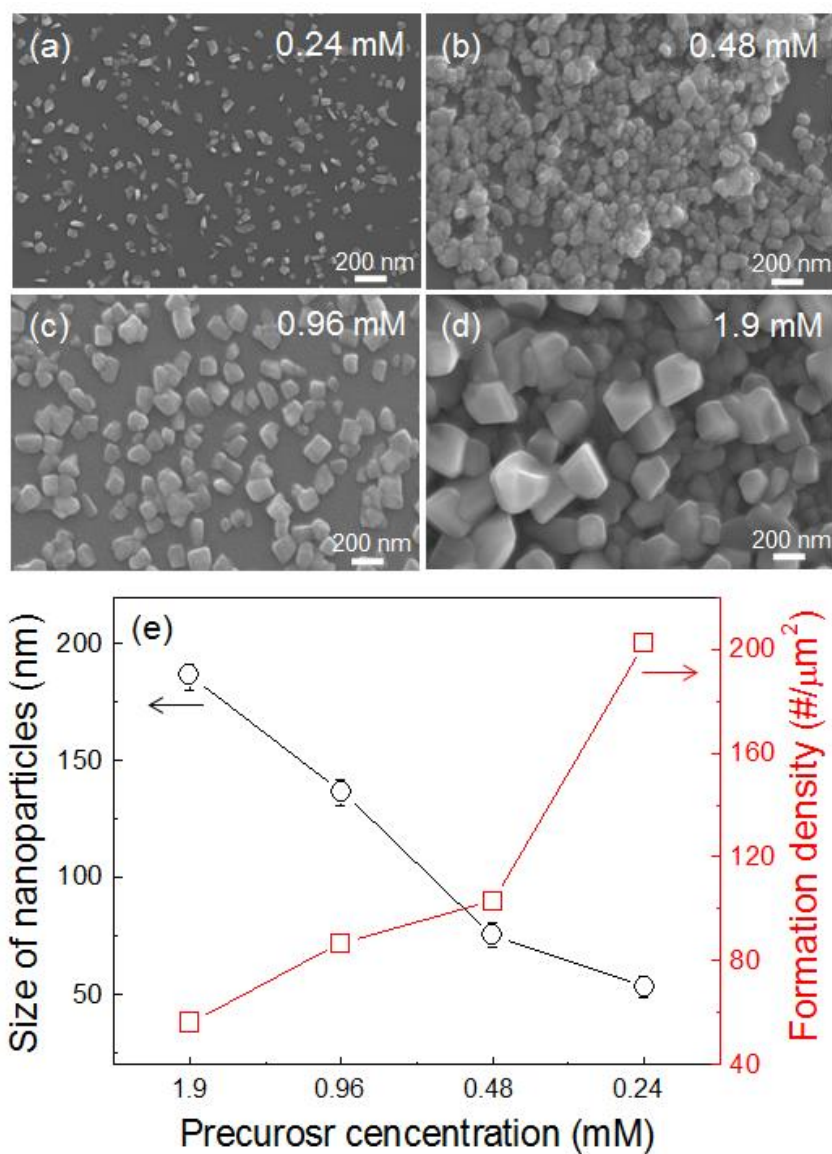

**Fig. S1.** Microstructures of Cu nanoparticles synthesized with different  $\text{CuSO}_4 \cdot 5\text{H}_2\text{O}$  precursor concentrations in  $\gamma$ -ray radiolysis at  $10\text{Gy}\cdot\text{h}^{-1}$  for 2h: (a) 0.24, (b) 0.48, (c) 0.96, and (d) 1.9 mM  $\text{CuSO}_4 \cdot 5\text{H}_2\text{O}$  in a mixed solvent of deionized water (77 vol%) and 2- propanol (23 vol%). (e) The size and formation density of Cu nanoparticles summarized from the microstructures in (a)–(d).

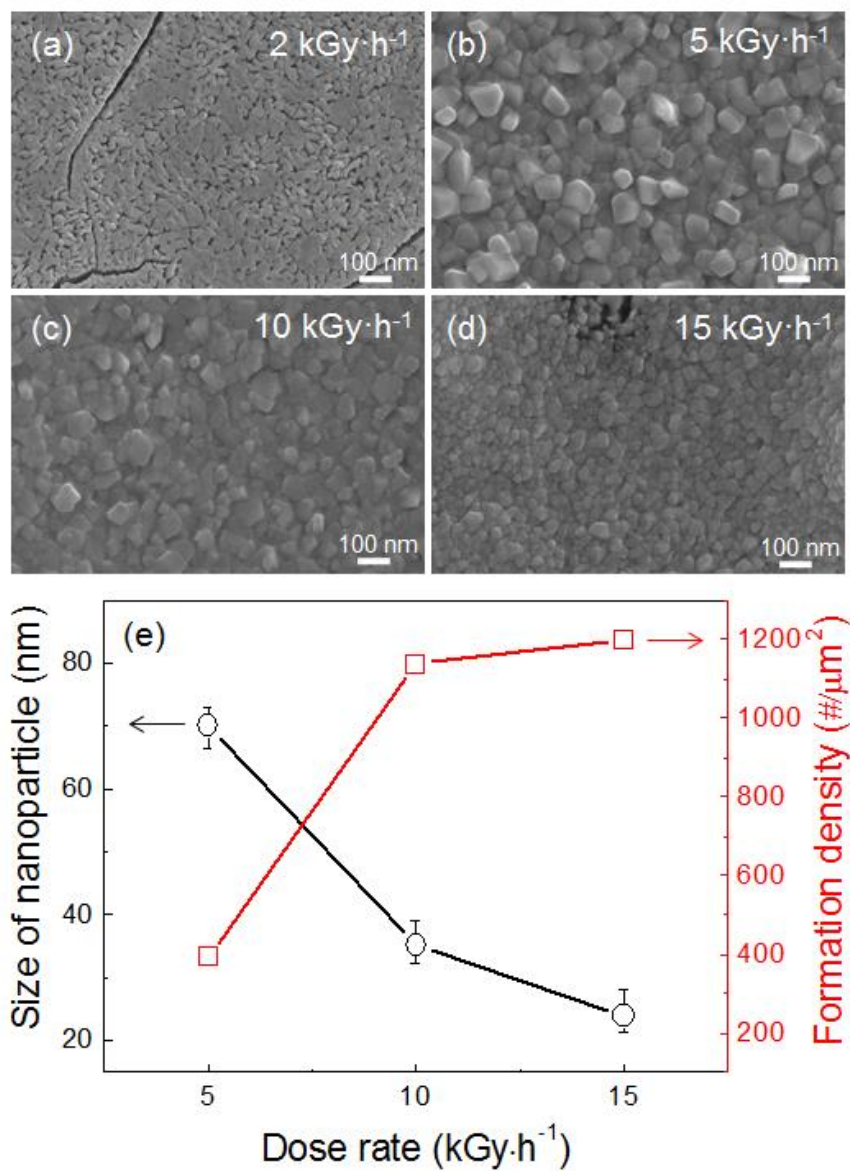

**Fig. S2.** Microstructures of Cu nanoparticles synthesized at various dose rates for 2 h at 0.96 mM CuSO<sub>4</sub>·5H<sub>2</sub>O : (a) 2, (b) 5, (c) 10, and (d) 15 kGy·h<sup>-1</sup> dose rate.(e) The size and formation density of Cu nanoparticles summarized from the microstructures in (c)–(d).

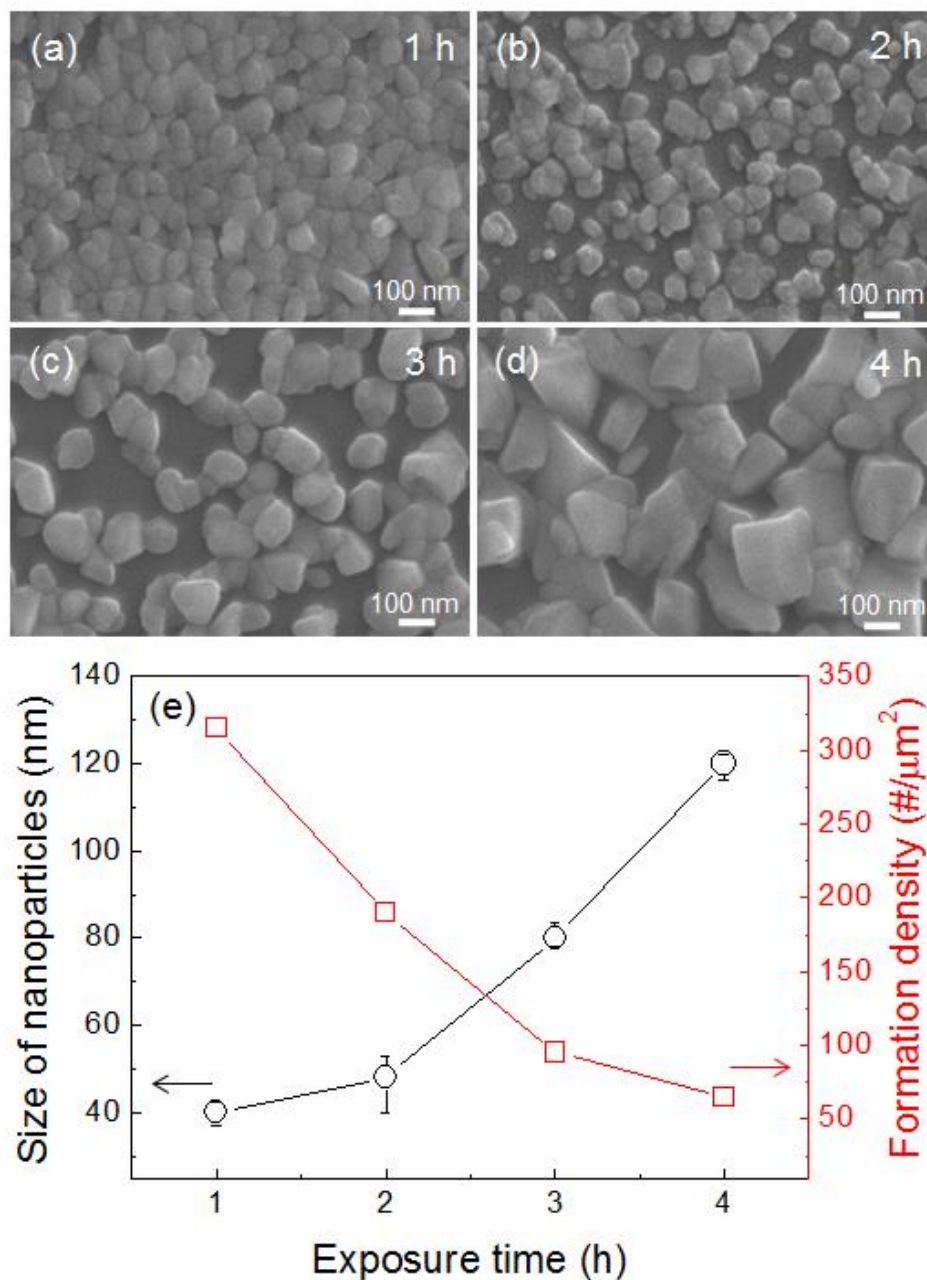

**Fig. S3.** Microstructures of Cu nanoparticles synthesized for various exposure times at  $10 \text{ kGy}\cdot\text{h}^{-1}$   $\gamma$ -ray and  $0.96 \text{ mM CuSO}_4\cdot 5\text{H}_2\text{O}$ : (a) 1, (b) 2, (c) 3, and (d) 4 h. (e) The size and formation density of Cu nanoparticles summarized from the microstructures in (a)–(d).
